# Supplementary material for: Productive Performance, Physiological Variables, and Carcass Quality of Finishing Pigs Supplemented with Ferulic Acid and Grape Pomace under Heat Stress Conditions
Source: MDPI journal article supplement (doi:10.3390/ani13142396), 2023-07-24
Supplement: s1 [file s1]

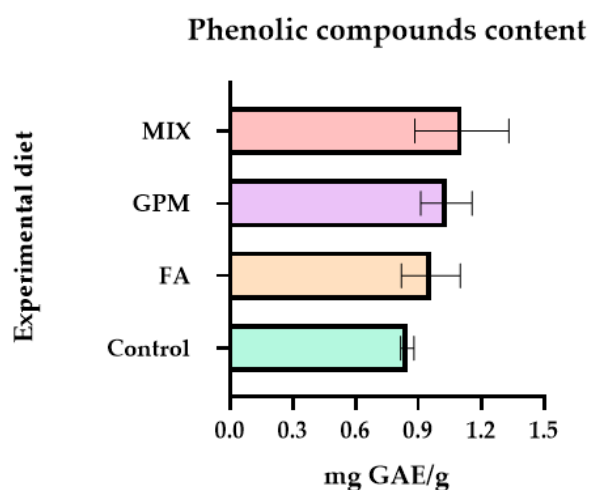

**Supplementary Figure S1.** Phenolic compounds content in experimental diets. Control (basal diet, BD without additives); FA, BD + 25 mg FA/ kg feed; GPM, BD + 2.5% GPM/ kg; and MIX, BD + 25 mg FA + 2.5% GPM/kg. GAE: Gallic acid equivalents. Bars are the mean  $\pm$  standard error of 3 replicates.

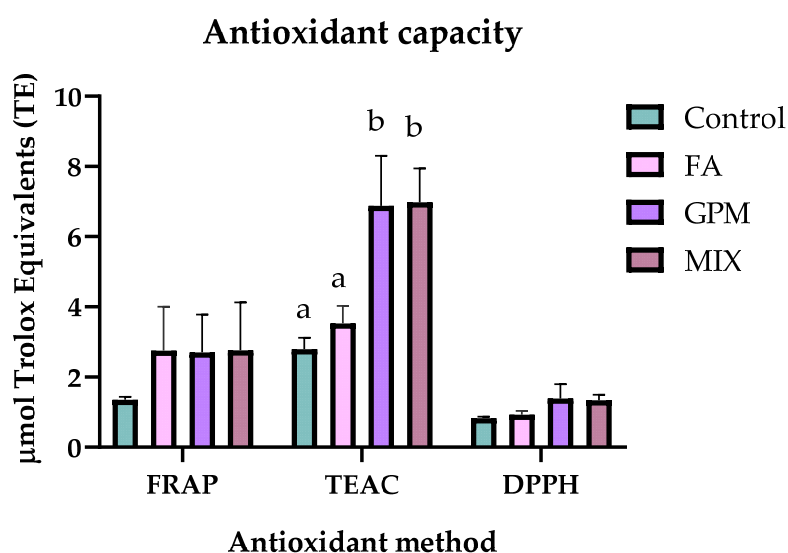

**Supplementary Figure S2.** Antioxidant capacity of experimental diets. Control (basal diet, BD without additives); FA, BD + 25 mg FA/ kg feed; GPM, BD + 2.5% GPM/ kg; and MIX, BD + 25 mg FA + 2.5% GPM/kg. Bars are the mean  $\pm$  standard error of 3 replicates.
